# Supplementary material for: Eating disorders, primary care, and stigma: an analysis of research trends and patterns
Source: Frontiers journal article supplement (doi:10.3389/fpsyt.2023.1243922), 2023-09-29
Supplement: Data_Sheet_2.PDF [file Data_Sheet_2.PDF]

```
---
title: 'Eating Disorders, Primary Care, and Stigma: An Analysis of
  Research Trends
  and Patterns'
author: "Erkan TİYEKLİ"
date: "2023-07-24"
output: html_document
---
```

```
```${r setup, include=FALSE}
knitr::opts_chunk$set(echo = TRUE)
```
```

## ## R Markdown

This is an R Markdown document. Markdown is a simple formatting syntax for authoring HTML, PDF, and MS Word documents. For more details on using R Markdown see <http://rmarkdown.rstudio.com>.

When you click the **Knit** button a document will be generated that includes both content as well as the output of any embedded R code chunks within the document. You can embed an R code chunk like this:

```
```${r cars}
summary(cars)
```
```

## ## Including Plots

You can also embed plots, for example:

```
```${r pressure, echo=FALSE}
plot(pressure)
```
```

Note that the `echo = FALSE` parameter was added to the code chunk to prevent printing of the R code that generated the plot.

```
# Load Libraries
library(bibliometrix)
```

#Please note that our software is open source and available for use, distributed under the MIT license.

When it is used in a publication, we ask that authors properly cite the following reference:

Aria, M. & Cuccurullo, C. (2017) bibliometrix: An R-tool for comprehensive science mapping analysis,  
Journal of Informetrics, 11(4), pp 959-975,

Elsevier.

Failure to properly cite the software is considered a violation of the license.

For information and bug reports:

- Take a look at <https://www.bibliometrix.org>
- Send an email to [info@bibliometrix.org](mailto:info@bibliometrix.org)
- Write a post on [https://github.com/](https://github.com/massimoaria/bibliometrix/issues)

[massimoaria/bibliometrix/issues](https://github.com/massimoaria/bibliometrix/issues)

Help us to keep Bibliometrix and Biblioshiny free to download and use by contributing with a small donation to support our research team

(<https://bibliometrix.org/donate.html>)

To start with the Biblioshiny app, please digit:

#biblioshiny()

`biblioshiny()`

Installing mandatory package: shiny

Listening on <http://127.0.0.1:4823>
